# Supplementary material
Source: PubMed Central journal article supplement (PMC6735277)
Supplement: jnm224667SupplementalData.pdf [file jnm224667SupplementalData.pdf]

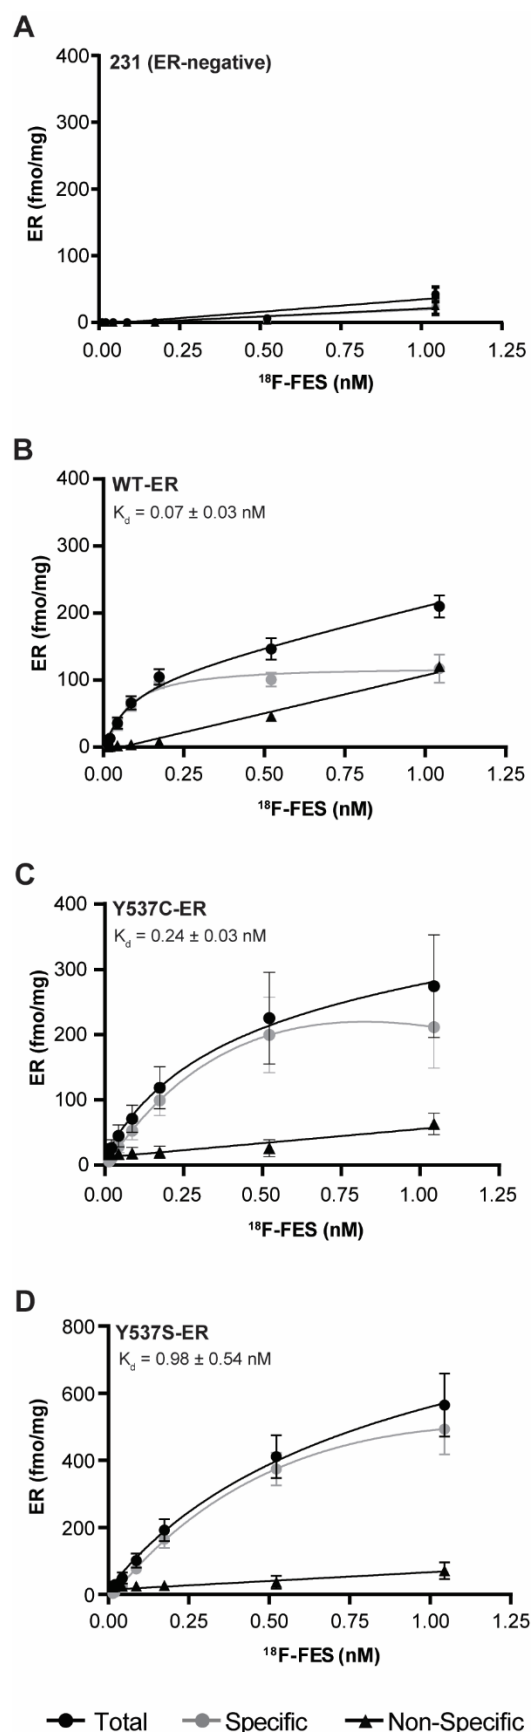

Supplemental Figure 1: Saturation binding of  $^{18}\text{F}$ -FES in Y537C-ER and Y537S-ER cells compared with WT-ER

Parental ER-negative MDA-MB-231 (A), WT-ER (B), Y537C-ER (C), and Y537S-ER cells (D) were seeded in 24-well plates then incubated in estrogen-deprived media with 5  $\mu\text{g}/\text{ml}$  doxycycline for 24 h. Plates were treated with 0.002-0.222 MBq (0.06-6  $\mu\text{Ci}$ )  $^{18}\text{F}$ -FES and were incubated for 1 h at 37  $^{\circ}\text{C}$ . Total, non-specific, and specific binding was determined from nonlinear regression. Values represent the mean  $\pm$  SEM of 3 independent experiments performed in triplicate.

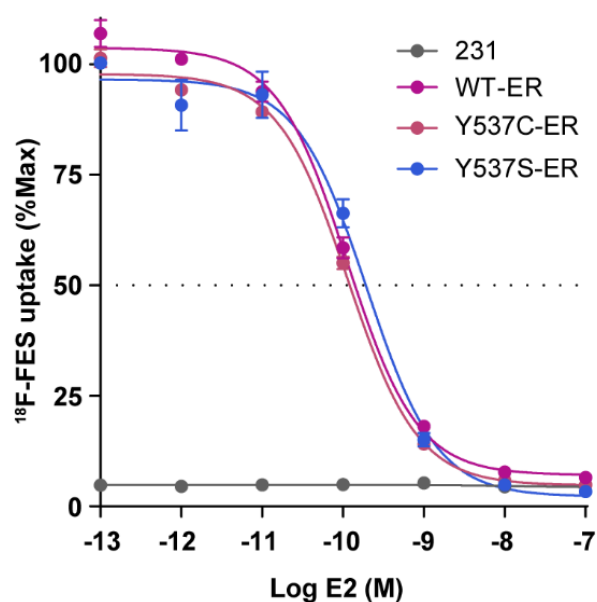

Supplemental Figure 2: Competition binding of  $^{18}\text{F}$ -FES with E2 in Y537C-ER and Y537S-ER cells compared with WT-ER

Parental ER-negative MDA-MB-231, WT-ER, Y537C-ER, and Y537S-ER cells were seeded in 24-well plates with estrogen-deprived media and were treated with 5  $\mu\text{g}/\text{mL}$  doxycycline for 24 h. Increasing amount of cold E2 ( $1 \times 10^{-13}$  to  $1 \times 10^{-7}$  M) were added with 0.037 MBq (1  $\mu\text{Ci}$ )  $^{18}\text{F}$ -FES for 1 h and incubated at 37  $^{\circ}\text{C}$ . Decay-corrected counts per minute were normalized to wells containing  $^{18}\text{F}$ -FES without E2 to calculate percentage maximum uptake values. MDA-MB-231 cell values were expressed relative to WT-ER to demonstrate binding specificity. Values represent the mean $\pm$ SEM of 3 independent experiments performed in triplicate.

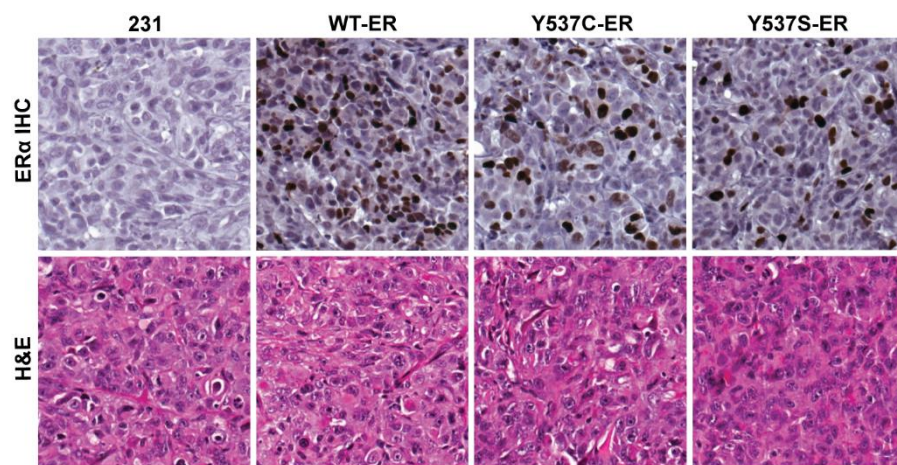

Supplemental Figure 3: ER immunohistochemistry of excised tumors post  $^{18}\text{F}$ -FES

biodistribution experiment

Representative 20x magnification images of ER immunohistochemistry (upper panel) and hematoxylin-eosin (H&E) staining (lower panel) of excised tumors.

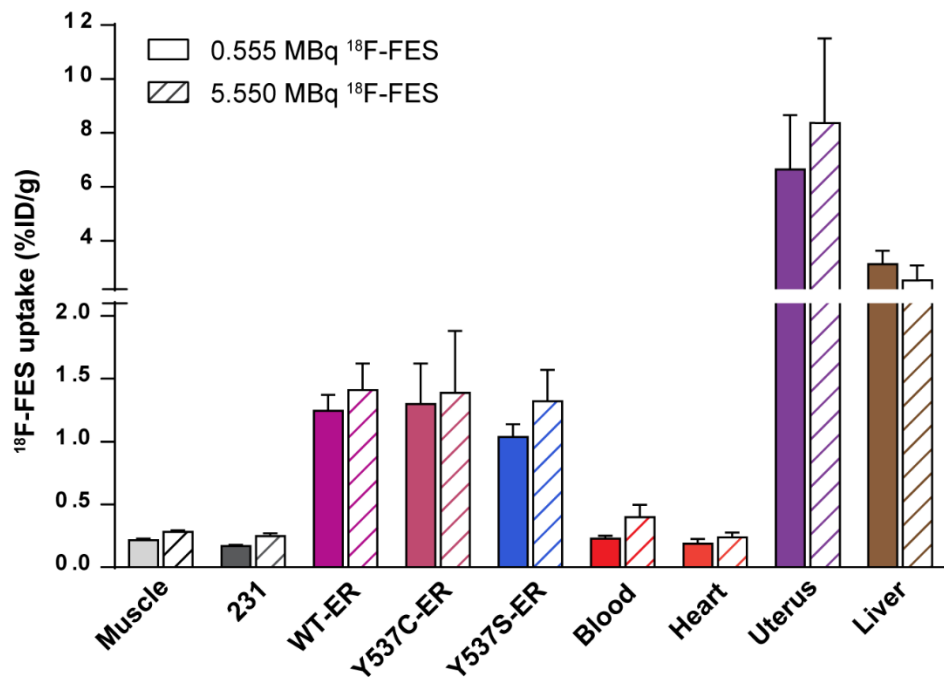

Supplemental Figure 4:  $^{18}\text{F}$ -FES tissue biodistribution panel

Biodistribution of  $^{18}\text{F}$ -FES at 0.555 MBq (15  $\mu\text{Ci}$ , 10 mice) and 5.55 MBq (150  $\mu\text{Ci}$ , 9 mice) injected doses in muscle, xenograft tumors, blood, heart, uterus and liver 1 h after tail vein injection. Data are expressed as %ID/g (mean $\pm$ SEM).  $p \geq 0.05$  for  $^{18}\text{F}$ -FES uptake at 0.55 MBq compared with 5.55 MBq.

**Supplemental Table 1: Primers for site-directed mutagenesis PCR using human ER $\alpha$**

| <b>Mutation</b> | <b>Sense Primer</b>                                                  | <b>Antisense Primer</b>                                              |
|-----------------|----------------------------------------------------------------------|----------------------------------------------------------------------|
| <b>Y537C</b>    | G TGC AAG AAC GTG <u>GTA</u> CCC CTC<br><u>TGT</u> GAC CTG CTG CTG G | C CAG CAG CAG GTC <u>ACA</u> GAG GGG<br><u>TAC</u> CAC GTT CTT GCA C |
| <b>Y537S</b>    | G TGC AAG AAC GTG <u>GTA</u> CCC CTC<br><u>TCT</u> GAC CTG CTG CTG G | C CAG CAG CAG GTC <u>AGA</u> GAG GGG<br><u>TAC</u> CAC GTT CTT GCA C |

**Supplemental Table 2: Sanger sequencing primers**

| <b>Primers</b>  | <b>pBluescript Vector</b> | <b>pUHD 10-3 Vector</b> |
|-----------------|---------------------------|-------------------------|
| <b>Forward</b>  | TGTAACGACGGCCAGT          | TCGAGTAGGCGTCTACGGT     |
| <b>Internal</b> | GCTGCAAGGCCTTCTTCAAG      | GCTGCAAGGCCTTCTTCAAG    |
| <b>Reverse</b>  | CAGGAAACAGCTATGAC         | ATAAAGCAATAGCATCAC      |

**Supplemental Table 3: Quantitative PCR primers**

| <b>Target</b>                      | <b>Forward Primer (5'-3')</b> | <b>Reverse Primer (5'-3')</b> |
|------------------------------------|-------------------------------|-------------------------------|
| <b>Progesterone Receptor (PGR)</b> | TGACACCTCCAGTTCTTTGC          | AACACCATTAAGCTCATCCAAG        |
| <b>Trefoil factor-1 (TFF1)</b>     | CGCCTTTGGAGCAGAGAG            | ACCACAATTCTGTCTTTCACG         |
| <b>Ribosomal protein 36B4</b>      | GACAATGGCAGCATCTACAAC         | GCAGACAGACACTGGCAAC           |
